1 **The merits of sustaining pneumococcal vaccination after transitioning from Gavi**  
2 **support – a modelling and cost-effectiveness study for Kenya**

3

4 John Ojal<sup>1,2</sup>, Ulla Griffiths<sup>4,5</sup>, Laura L. Hammitt<sup>1</sup>, Ifedayo Adetifa<sup>1,2</sup>, Donald Akech<sup>1</sup>, Collins Tabu<sup>3</sup>, J.  
5 Anthony G. Scott<sup>1,2</sup>, Stefan Flasche<sup>2</sup>

6

7

1. KEMRI-Wellcome Trust Research Programme, Centre for Geographic Medicine-Coast, Kilifi, Kenya

8

2. Department of Infectious Disease Epidemiology, Faculty of Epidemiology and Population Health, London School of  
9 Hygiene and Tropical Medicine, London, United Kingdom.

10

3. Kenya Ministry of Health, Nairobi, Kenya.

11

4. Department of Global Health and Development, London School of Hygiene and Tropical Medicine, London, United  
12 Kingdom.

13

5. UNICEF Health Section, Programme Division, 3 UN Plaza, New York, USA

14

15

16

17

18 Key words: pneumococcus; nasopharyngeal carriage; vaccination; mathematical modelling;  
19 cost-effectiveness; Kenya

20

21

22 Corresponding author:

23 John Ojal

24 PO Box 230- 80108

25 Kilifi, Kenya.

26 Tel +254 728 095 710

27 E-mail: [jojal@kemri-wellcome.org](mailto:jojal@kemri-wellcome.org)

28

29

30

31 **Abstract**

32 *Introduction*

33 Many low income countries soon will need to consider whether to continue pneumococcal  
34 conjugate vaccine (PCV) use at full costs as they transition from Gavi support. Using Kenya  
35 as a case study we assessed the incremental cost-effectiveness of continuing PCV use.

36

37 *Methods*

38 We fitted a dynamic compartmental model of pneumococcal carriage to annual carriage  
39 prevalence surveys and invasive pneumococcal disease (IPD) incidence in Kilifi, Kenya, and  
40 predicted disease incidence and related mortality for either continuing PCV use beyond 2022,  
41 the start of Kenya's transition from Gavi support, or its discontinuation. We calculated the  
42 costs per disability-adjusted-life-year (DALY) averted and associated prediction intervals  
43 (PI).

44

45 *Results*

46 We predicted that overall IPD incidence will increase by 93% (PI: 72% - 114%) from 8.5 in  
47 2022 to 16.2 per 100,000 per year in 2032, if PCV use is discontinued. Continuing  
48 vaccination would prevent 15,355 (PI: 10,196–21,125) deaths and 112,050 (PI: 79,620–  
49 130,981) disease cases during that time. Continuing PCV after 2022 will require an estimated  
50 additional US\$15.6 million annually compared to discontinuing vaccination. The incremental  
51 cost per DALY averted of continuing PCV was predicted at \$142 (PI: 85 - 252) in 2032.

52

53 *Conclusion*

54 Continuing PCV use is essential to sustain its health gains. Based on the Kenyan GDP per  
55 capita of \$1445, and in comparison to other vaccines, continued PCV use at full costs is cost-  
56 effective. These arguments support an expansion of the vaccine budget, however,  
57 affordability may be a concern.

58

59 *Funding*

60 Funded by the Wellcome Trust.

## 61 **Introduction**

62 The majority of African countries have introduced the pneumococcal conjugate vaccines  
63 (PCVs) in their childhood immunization programmes which has led to a substantial reduction  
64 in pneumococcal disease <sup>1,2</sup>. In Kilifi, a coastal area in Kenya with enhanced surveillance for  
65 bacterial diseases, overall invasive pneumococcal disease (IPD) decreased by 68% in the post  
66 vaccination period (2012-2016) in children aged <5 years <sup>3</sup>.

67

68 Although PCVs are among the most expensive vaccines available, most African countries  
69 were not concerned about affordability or cost-effectiveness when deciding to introduce PCV  
70 as Gavi, the Vaccine Alliance, took over the majority of vaccine costs. However, countries  
71 are expected to transition from Gavi support and subsequently take over the full costs once  
72 their 3-year-average Gross National Income per capita exceeds \$1580. Currently three  
73 African countries (Angola, Congo Rep. and Nigeria) are in the accelerated transition phase <sup>4</sup>  
74 and six more (Ghana, Ivory Coast, Lesotho, Sudan, Kenya and Zambia) are expected to join  
75 within the next five years. With the increase in PCV costs upon transition countries will need  
76 to independently assess the cost-effectiveness and the affordability of sustaining PCV use.

77

78 Kenya introduced the 10 valent PCV (PCV10) in 2011 with Gavi's support and has recently  
79 entered the preparatory transition phase, which will see their current contribution of \$0.21 per  
80 dose increase by 15% annually. In 2022 Kenya will enter the accelerated transition phase that  
81 gradually increases their cost contribution to the full Gavi price of \$3.05 by 2027 and thereby  
82 increasing PCV costs by 15 fold compared to current expenditure <sup>4</sup>. Hence, before entering  
83 the accelerated transition-phase Kenya will need to evaluate whether to continue with PCV  
84 and or discontinue. We here assess the incremental impact and cost-effectiveness of  
85 continuing.

86

## 87 **Methods**

88 We used a dynamic pneumococcal transmission model in combination with a costing model  
89 to estimate the cost-effectiveness of the two major policy options for PCV use in Kenya from  
90 2022; i.e. continuation of PCV use at Gavi's current and scheduled prices or discontinuing the  
91 vaccine. The approach accounts for the uncertainty in both epidemiology and costing  
92 estimates and propagates it to the predicted outcomes.

93

#### 94 *Disease model and incidence prediction*

95 The details of the transmission model have been described elsewhere<sup>5</sup>. In brief, we used a  
96 compartmental, age-structured, dynamic model (Appendix, Supplementary Figure 3). The  
97 model has a Susceptible-Infected-Susceptible (SIS) structure for three serotype groups: the  
98 vaccine serotypes (VT), strongly competitive non-vaccine serotypes (sNVT) and weakly  
99 competitive non-vaccine serotypes (wNVT). We calibrated the model to age-stratified annual  
100 pre-vaccination (2009-2010) and post-vaccination (2011-2016) pneumococcal carriage  
101 prevalence by fitting serotype competition, susceptibility to infection if exposed and vaccine  
102 efficacy using non-informative priors for all parameters except the vaccine efficacy  
103 (Appendix).

104

105 In Kilifi, PCV vaccination was introduced together with a catch-up campaign in children <5  
106 years old. To extrapolate findings to the rest of Kenya, where PCV was introduced without a  
107 catch-up campaign, the fitted model was re-run under these conditions. We predicted carriage  
108 incidence for a 15-year period, from 2017 to 2032. We predicted IPD incidence by  
109 multiplying modelled age-specific carriage incidence with case-to-carrier ratios (CCR). For  
110 each model posterior the CCRs were calculated as the ratio of the observed pre-vaccination  
111 IPD incidence at Kilifi Country Hospital (KCH)<sup>3</sup> to modelled pre-vaccination carriage  
112 incidence. The CCR were assumed to remain unchanged post-vaccination.

113

114 IPD was defined as isolation of *Streptococcus pneumoniae* from a sterile site culture in an  
115 individual admitted to KCH. We split the predicted IPD incidence into the age dependent

116 proportions that are pneumococcal meningitis, pneumococcal sepsis and bacteraemic  
117 pneumococcal pneumonia incidence based on the distribution observed in clinical data from  
118 KCH (Supplementary Table S1). We defined pneumococcal meningitis as isolation of  
119 *Streptococcus pneumoniae* from cerebrospinal fluid (CSF) or isolation of *S. pneumoniae* from  
120 blood, accompanied by a CSF white blood cell count of  $50 \times 10^6$  cells/L or greater or a ratio  
121 of CSF glucose to plasma glucose less than 0.1. Bacteraemic pneumococcal pneumonia was  
122 defined as IPD with no pneumococcal meningitis but with WHO severe or very severe  
123 pneumonia. Pneumococcal sepsis was defined as IPD not meeting the definitions of  
124 pneumococcal meningitis or bacteraemic pneumococcal pneumonia. We further assumed that  
125 for every prevented case of IPD one would prevent 5.3 cases of clinically-defined pneumonia  
126 <sup>3,6</sup>. This ratio was estimated by dividing the vaccine preventable clinical pneumonia incidence  
127 (351 per 100,000 per year) <sup>3</sup> to vaccine preventable IPD incidence (66.3 per 100,000 per year)  
128 <sup>6</sup> that were both estimated from surveillance at KCH. The hospital surveillance in KCH was  
129 found to underestimate the incidence of pneumonia and meningitis by 45% and 30%  
130 respectively <sup>7</sup>. We accounted for this age-independent under reporting in our analysis by  
131 inflating case numbers commensurately.

132

### 133 *Vaccination program costs*

134 The program costs included vaccine costs, vaccine wastage, safety boxes, administering  
135 syringes for each dose, reconstitution syringes for each vial, syringe wastage and vaccine  
136 delivery cost (Table 1). Vaccine cost used for each year was calculated according to Gavi  
137 transitions rules (Supplementary Table 2). The vaccine delivery cost included the vaccine  
138 supply chain cost and immunization service delivery cost. The initial investment in expanding  
139 the cold chain capacity in 2011 was not included. A switch from 2-dose to 4-dose  
140 presentation occurred in 2017. The 4-dose presentation has a preservative and once opened  
141 for the first time the vial can be kept for up to 28 days, therefore, no noteworthy change in  
142 vaccine wastage rates is expected <sup>8</sup>.

143

144 *Treatment costs*

145 We adopted a societal perspective in our analyses, i.e. including direct medical costs, the  
146 opportunity cost of caretaker time and household out-of-pocket costs.

147 To apply the appropriate treatment costs, we divided the cases into three groups depending on  
148 where they were treated: hospitalised cases, cases treated as outpatients and those that did not  
149 reach medical care (Table 1). All costs not referring to 2016 were converted into 2016 US  
150 dollars for our analysis by using the International Monetary Fund's (IMF) GDP deflators for  
151 Kenya.

152

153 *Disability Adjusted Life Years (DALYs)*

154 The treatment costs for the predicted number of cases for the four syndromes considered and  
155 the vaccination cost of birth cohorts were estimated and used to calculate the costs per  
156 disability-adjusted-life-year (DALY) averted. The years lost due to disability (YLD) were  
157 calculated as the product of disease incidence, duration of disease and disability weights. We  
158 used disability weights from the 2013 global burden of disease study<sup>9</sup> in calculating YLD  
159 component of DALYs. We used the disability weight of 0.133, assigned for infectious  
160 diseases with severe acute episodes, for both IPD and non-bacteraemic pneumonia episodes.  
161 For meningitis sequelae, we used a disability weight of 0.542 assigned for motor plus  
162 cognitive impairment. We assumed a duration of 15 days for all IPD syndromes and 7 days  
163 for non-bacteraemic pneumonia. Meningitis sequelae were assumed to last a lifetime. We  
164 used the Kenyan age specific life expectancies<sup>10</sup> in calculating the Year of Life Lost (YLL)  
165 due to death. The discount rate on costs and DALYs was set at 3%.

166

167 *Sensitivity analysis of the cost inputs and disease model*

168 The full uncertainty of both epidemiological and costs parameters was propagated to the  
169 results as follows: for each posterior estimate of the epidemiological model we sampled a set  
170 of cost parameters from the pre-set distributions, effectively combining probabilistic fitting of

171 the epidemiological mode with a probabilistic sensitivity analysis of the costing model (Table  
172 1).

173

174 In Kenya, children who are carriers of VT pneumococci have been observed to respond less  
175 well to vaccine than non-carriers<sup>11</sup>. To assess structural uncertainty in our model we ran our  
176 analyses either with or without accounting for hyporesponsiveness. In the base case, we  
177 estimated a single vaccine efficacy independent of carrier status; in the sensitivity analysis,  
178 vaccine efficacy was estimated separately in vaccine-type carriers and in others. We also  
179 present two scenarios of discounting, i.e. discounting both costs and DALYs at 3% (base  
180 case) or discounting costs alone.

181

## 182 **Results**

### 183 *Model fit and predicted IPD incidence*

184 There was good agreement between the observed and fitted age-group and serotype-group  
185 specific carriage prevalence (Figure 1 & Appendix) and IPD incidence (Figure 2). If cohorts  
186 of children born after the start of year 2022 are no longer vaccinated with PCV, the model  
187 predicts that IPD incidence will bounce back from 8.5, in 2022 to 16.2 per 100,000 per year  
188 in 2032 equalling pre PCV levels (Figure 3). Continuing with PCV is predicted to result in  
189 additional small reductions in IPD incidence to 7.9 per 100,000 per year in 2032, and to avert  
190 15,355 (PI: 10,196–21,125) deaths and 112,050 (PI: 79,620–130,981) IPD and non-  
191 bacteraemic pneumonia cases during the 11 years considered, compared to discontinuing the  
192 PCV in 2022.

193

### 194 *Estimated costs and cost effectiveness*

195 If vaccination was to be stopped in 2022 the estimated average annual treatment cost for  
196 pneumococcal disease in Kenya would be \$3,275,143. Otherwise, average annual treatment  
197 and vaccination costs for continuing PCV during 2022-2032 were estimated as \$18,851,991  
198 (Table 2). Discontinuing PCV was predicted to partially sustain direct and indirect protection



199 from the vaccination of previous cohorts for some of the study period with gradually  
200 declining impact on IPD incidence. As a result, we predict that continuation of PCV will not  
201 be cost effective initially. However, we show that within only one year after the decision to  
202 continue PCV the incremental cost-effectiveness ratio (ICER), in comparison to discontinuing  
203 PCV, improves substantially towards the threshold of the Kenyan GDP per capita (\$1455 in  
204 2016) and continues to improve throughout the study period (Figure 3). Compared to  
205 discontinuing PCV in 2022, we predicted that, in 2032, the cost per DALY averted is \$142,  
206 the cost per case averted \$876 and the cost per death averted \$6366 (Table 2).

207

### 208 *Sensitivity analyses*

209 Using the Kenyan GDP per capita of \$1455 in 2016 as a threshold to determine cost  
210 effectiveness, all posterior samples indicated that continuation of PCV vaccination is cost  
211 effective no more than six years after 2022. Compared to discounting both costs and DALYs,  
212 discounting costs alone resulted in an ICER that was twice as favourable (Table 2).

213

214 We estimate that the effect of hyporesponsiveness is relatively small. Vaccine serotype  
215 carriers had a vaccine efficacy estimate against carriage that was 4 percentage points lower  
216 than that for other vaccinees (Appendix, table A1). Hence omitting this mechanism in the  
217 model structure led to similar results (Supplementary Figure 3). Therefore, we did not include  
218 hyporesponsiveness in our final model.

219

### 220 **Discussion**

221 In the near future Kenya, like several other low income countries, will be expected to take  
222 over the full cost of the national pneumococcal conjugate vaccination procurement. In this  
223 study, we have estimated the cost-effectiveness of continuing PCV using Gavi's schedule of  
224 vaccine prices, which reach a peak at \$3.05 per dose in 2027, at which point Kenya becomes  
225 fully self-financing. Our model projects that discontinuing PCV would lead to an increase in  
226 IPD burden equivalent to pre-vaccination levels within ten years. Initially, continuing

227 vaccination may not be cost-effective because of the benefits accrued through vaccination of  
228 previous cohorts. However, the cost-effectiveness becomes substantially more favourable  
229 within a few years and, by 2032, the cost (in 2016 US dollars) plateaus at \$142 (\$85 -\$252)  
230 per discounted DALY averted.

231

232 The most commonly used threshold for judging the cost-effectiveness of an intervention is a  
233 country's Gross Domestic Product (GDP) per capita. Using this criterion, we find  
234 continuation of PCV in Kenya after transition from Gavi support highly cost-effective. The  
235 GDP per capita threshold was initially supported by the Commission on Macroeconomics and  
236 Health <sup>12</sup> and adopted by WHO's Choosing Interventions that are Cost-Effective project  
237 (WHO-CHOICE). The use of GDP-based thresholds has been criticized because it: (i) does  
238 not consider the cost-benefits profile of interventions competing for the same health budget;  
239 (ii) does not adequately address the willingness to pay; (iii) does not address affordability and  
240 (iv) is easily attained. Alternatives include benchmarking of interventions by assessing a  
241 country's willingness to pay by comparing cost-effectiveness ratios against that of vaccines  
242 currently in use.

243

244 The cumulative costs per DALY averted of introducing the Rotarix or the RotaTeq rotavirus  
245 vaccines in Kenya have been estimated as \$200 and \$406 (2016 US Dollars) respectively.  
246 Similar to our estimates these were derived based on a societal perspective with a 3%  
247 discounting of both costs and benefits <sup>13</sup>. The *Haemophilus influenzae* type B (Hib) vaccine  
248 was introduced in 2001 Kenya as part of the pentavalent vaccine. In a static model developed  
249 to follow the Kenyan 2004 birth cohort until death, with and without Hib vaccine, it was  
250 estimated that the discounted (3% for both costs and benefits) cost per DALY averted of  
251 introducing Hib vaccine was \$85 (2016 US Dollars) from a health provider perspective <sup>14</sup>.  
252 This suggests that continuation of PCV is less cost-effective than the Hib vaccine and more  
253 cost-effective than the rotavirus vaccine. However, these comparisons must be tempered by

254 the fact that the rotavirus analysis ignored herd immunity, while the Hib analysis took a  
255 health provider perspective, both of which decrease cost-effectiveness.  
256  
257 Cost-effectiveness, however, does not necessarily imply affordability. The later depends on  
258 available resources in the health budget, or any other sources within the national accounts that  
259 can fill the gap in the health budget. Budgetary allocation to the health sector as a fraction of  
260 national government budget has slightly declined from 4% in financial year 2014/15 to 3.7%  
261 in financial year 2016/17 <sup>15</sup>. The Kenyan annual health budget for 2015 was \$600 million <sup>15</sup>.  
262 Out of this \$6.9 million (0.8%)<sup>16</sup> was spent on vaccines. This has been possible because  
263 Kenya only needs to fund 10% of its vaccines from its revenues, donors fund the rest of the  
264 budget <sup>17</sup>. We have estimated that continuing with PCV after 2022 will require an additional  
265 \$15.6 million annually compared to discontinuing PCV; in other words, it will more than  
266 double Kenya current expenditure on vaccines. At the same time, following transition from  
267 Gavi support, the Kenyan government financial contribution for pentavalent, rotavirus and  
268 yellow fever vaccines, will need to increase as well if Kenya wants to sustain their current  
269 vaccine portfolio, putting further stress to the budget.  
270  
271 Several initiatives indicate that the cost of the PCV procurement may be reduced in future.  
272 For instance, the Serum Institute of India is developing of a 10-valent PCV with a target per-  
273 dose price of \$2.00 <sup>18</sup>. Also, in settings where vaccine serotypes have been eliminated from  
274 circulation it may be possible to sustain control of transmission using a two-dose or even one-  
275 dose schedule<sup>19</sup>. If vaccine serotypes can be eliminated in Kenya, for example by additional  
276 efforts such as a catch-up campaign, then the shift to a reduced dose schedule may also be  
277 feasible. Most of these options will have a wider evidence base that may allow their formal  
278 consideration by 2022. Currently there is insufficient support to include them in our analyses  
279 but if proven to be effective these aspects will further improve on our PCV cost-effectiveness  
280 estimates of sustaining PCV in Kenya.  
281

282 There are potential limitations to our study. The proportion of pneumococcal disease cases  
283 that are hospitalized, treated as outpatients or do not access care is a key determinant of both  
284 costs incurred as well as DALYs, by determining the case fatality rate. Overestimating the  
285 proportion of cases that get hospital treatment would mean that the overall costs of treatment  
286 were overestimated while the fatal cases, and therefore DALYs, were underestimated. The  
287 overall effect would be an overestimated ICER, which is conservative. In our analysis, we  
288 estimated the proportion of cases that were hospitalized using local surveillance data.  
289 However, we did not have local information on what proportion among non-hospitalised  
290 cases are treated as outpatients; this was obtained from a Ugandan verbal autopsy study  
291 among fatal pneumonia cases<sup>20</sup>. It is possible, therefore, that we have overestimated the  
292 number of patients among non-hospitalised treated as outpatients, and, by extension,  
293 overestimated the ICER.

294

295 Several low-income countries will soon be transitioning out of Gavi support and will need to  
296 decide whether to sustain their pneumococcal conjugate vaccination. We demonstrate, using  
297 Kenya as an example, how ongoing detailed surveillance can be combined with mathematical  
298 modelling and health economics to inform an upcoming decision of a country's National  
299 Immunization Technical Advisory Group (NITAG) on the cost-effectiveness of different  
300 policy options. We estimate that maintaining PCV is essential to sustain the decreased burden  
301 of pneumococcal disease and that it is cost-effective against conventional criteria. However,  
302 to afford PCV vaccination in the post-Gavi era, Kenya will need to substantially increase the  
303 proportion of health spending on routine immunization.

304

### 305 **Author Contributions**

306 The study was conceived by UG and JAGS. The model was designed by JO and SF and  
307 coding and simulations were by JO. LLH, DA, IA, JAGS conducted the pneumococcal  
308 carriage surveys and/or oversaw the IPD surveillance. JO wrote the first draft of the

309 manuscript. All authors read and critically reviewed the manuscript and approved the final  
310 version.

311

312 **Ethics statement**

313

314 The study was part of the Pneumococcal Conjugate Vaccine Impact Study (PCVIS) approved  
315 by the Kenya Medical Research Institute (KEMRI) Ethical review committee (SSC 1433). It  
316 has an additional approval by OXTREC (OXTREX 30-10), the Oxford Tropical Research  
317 Ethics Committee, with delegated authority from the London School of Hygiene & Tropical  
318 Medicine (LSHTM) Research Ethics Committee.

319

320 **Acknowledgements**

321

322 This paper is published with the permission of the Director, KEMRI. The work was funded  
323 by the Wellcome Trust through fellowship support to John Ojal (092767) and Anthony Scott  
324 (098532). Stefan Flasche is supported through a Sir Henry Dale Fellowship jointly funded by  
325 the Wellcome Trust and the Royal Society (Grant Number 208812).

326

327 **Conflict of interest:** None.

328

## 329 **References**

- 330 1 Mackenzie GA, Hill PC, Jeffries DJ, *et al.* Effect of the introduction of pneumococcal  
331 conjugate vaccination on invasive pneumococcal disease in The Gambia: A  
332 population-based surveillance study. *Lancet Infect Dis* 2016; : 703–11.
- 333 2 von Gottberg A, de Gouveia L, Tempia S, *et al.* Effects of Vaccination on Invasive  
334 Pneumococcal Disease in South Africa. *N Engl J Med* 2014; **371**: 141111140010002.
- 335 3 Hammitt LL, Anthony E, Morpeth SC, *et al.* Population effect of 10-valent  
336 pneumococcal conjugate vaccine on invasive pneumococcal disease and  
337 nasopharyngeal carriage in Kilifi, Kenya. *Submitted* 2018.
- 338 4 Transition process - Gavi, the Vaccine Alliance.  
339 <http://www.gavi.org/support/sustainability/transition-process/> (accessed July 10,  
340 2017).
- 341 5 Ojal J, Flasche S, Hammitt LL, *et al.* Sustained reduction in vaccine-type invasive  
342 pneumococcal disease despite waning effects of a catch-up campaign in Kilifi, Kenya:  
343 a mathematical model based on pre-vaccination data. *Vaccine* 2017; **35**: 4561–8.
- 344 6 Silaba M, Ooko M, Bottomley C, *et al.* The impact of 10-valent Pneumococcal  
345 Conjugate Vaccine on the incidence of radiologically-confirmed pneumonia and on  
346 clinically-defined pneumonia among children in Kilifi, Kenya. *Submitted* 2018.
- 347 7 Moisi JC, Nokes DJ, Gatakaa H, *et al.* Sensitivity of hospital-based surveillance for  
348 severe disease: a geographic information system analysis of access to care in Kilifi  
349 district, Kenya. *Bull World Health Organ* 2011; **89**: 102–11.
- 350 8 Gavi. Pneumococcal Conjugate Vaccine ( PCV ) 4-dose vial presentations. 2017; : 1–  
351 9.
- 352 9 Salomon JA, Haagsma JA, Davis A, *et al.* Disability weights for the Global Burden of  
353 Disease 2013 study. *Lancet Glob Heal* 2015; **3**: 712–23.
- 354 10 GHO | By category | Life tables by country - Kenya. WHO.  
355 <http://apps.who.int/gho/data/?theme=main&vid=60850> (accessed July 11, 2017).
- 356 11 Ojal J, Hammitt LL, Gaitho J, Scott JAG, Goldblatt D. Pneumococcal conjugate

- 357 vaccine induced IgG and nasopharyngeal carriage of pneumococci:  
358 Hyporesponsiveness and immune correlates of protection for carriage. *Vaccine* 2017;  
359 **35**: 4652–7.
- 360 12 Sachs JD. Macroeconomics and Health: Investing in Health for Economic  
361 Development: Report of the Commission on Macroeconomics and Health. *Nat Med*  
362 2001; **8**: 1–200.
- 363 13 van Hoek AJ, Ngama M, Ismail A, *et al.* A Cost Effectiveness and Capacity Analysis  
364 for the Introduction of Universal Rotavirus Vaccination in Kenya: Comparison  
365 between Rotarix and RotaTeq Vaccines. *PLoS One* 2012; **7**.  
366 DOI:10.1371/journal.pone.0047511.
- 367 14 Oloo Akumu A. Economic evaluation of delivering Haemophilus influenzae type b  
368 vaccine in routine immunization services in Kenya. *Bull World Health Organ* 2007; **85**:  
369 511–8.
- 370 15 Kenya Ministry of Health. National and County Health Budget Analysis  
371 FY2015/2016. 2016. [http://www.healthpolicyplus.com/ns/pubs/6138-](http://www.healthpolicyplus.com/ns/pubs/6138-6239_FINALNationalandCountyHealthBudgetAnalysis.pdf)  
372 [6239\\_FINALNationalandCountyHealthBudgetAnalysis.pdf](http://www.healthpolicyplus.com/ns/pubs/6138-6239_FINALNationalandCountyHealthBudgetAnalysis.pdf) (accessed March 31,  
373 2018).
- 374 16 2016/2017 Estimates of development expenditure of the government of Kenya for the  
375 year ending 30th June, 2017. Volume II (votes d1065-d1132) June 2016. 2017.  
376 [https://www.cabri-sbo.org/en/documents/2016-2017-estimates-of-development-](https://www.cabri-sbo.org/en/documents/2016-2017-estimates-of-development-expenditure-of-the-government-of-kenya-for-the-year-ending-30th-june-2017-volume-ii)  
377 [expenditure-of-the-government-of-kenya-for-the-year-ending-30th-june-2017-volume-](https://www.cabri-sbo.org/en/documents/2016-2017-estimates-of-development-expenditure-of-the-government-of-kenya-for-the-year-ending-30th-june-2017-volume-ii)  
378 [ii](https://www.cabri-sbo.org/en/documents/2016-2017-estimates-of-development-expenditure-of-the-government-of-kenya-for-the-year-ending-30th-june-2017-volume-ii) (accessed March 31, 2018).
- 379 17 The Global Alliance for Vaccines and Immunisation. Country co-financing  
380 information sheet, Kenya. 2017.  
381 [https://www.gavi.org/country/kenya/documents/cofiss/co-financing-information-](https://www.gavi.org/country/kenya/documents/cofiss/co-financing-information-sheet-kenya/)  
382 [sheet-kenya/](https://www.gavi.org/country/kenya/documents/cofiss/co-financing-information-sheet-kenya/) (accessed March 31, 2018).
- 383 18 Burki TK han. Pricing of pneumococcal conjugate vaccine challenged. *Lancet Respir*  
384 *Med* 2015; **3**: 427.

- 385 19 Flasche S, Van Hoek AJ, Goldblatt D, *et al.* The Potential for Reducing the Number of  
386 Pneumococcal Conjugate Vaccine Doses While Sustaining Herd Immunity in High-  
387 Income Countries. *PLoS Med* 2015; **12**: 1–5.
- 388 20 Källander K, Hildenwall H, Waiswa P, Galiwango E, Peterson S, Pariyob G. Delayed  
389 care seeking for fatal pneumonia in children aged under five years in Uganda: A case-  
390 series study. *Bull World Health Organ* 2008; **86**: 332–8.
- 391 21 Edmond K, Clark A, Korczak VS, Sanderson C, Griffiths UK, Rudan I. Global and  
392 regional risk of disabling sequelae from bacterial meningitis: A systematic review and  
393 meta-analysis. *Lancet Infect Dis* 2010; **10**: 317–28.
- 394 22 Berkley JA, Lowe BS, Mwangi I, *et al.* Bacteremia among children admitted to a rural  
395 hospital in Kenya. *N Engl J Med* 2005; **352**: 39–47.
- 396 23 Ayieko P, Griffiths UK, Ndiritu M, *et al.* Assessment of health benefits and cost-  
397 effectiveness of 10-valent and 13-valent pneumococcal conjugate vaccination in  
398 Kenyan children. *PLoS One* 2013; **8**: e67324.
- 399 24 Gavi welcomes new record low price for pneumococcal vaccine.  
400 [http://www.gavi.org/library/news/statements/2016/gavi-welcomes-new-record-low-](http://www.gavi.org/library/news/statements/2016/gavi-welcomes-new-record-low-price-for-pneumococcal-vaccine/)  
401 [price-for-pneumococcal-vaccine/](http://www.gavi.org/library/news/statements/2016/gavi-welcomes-new-record-low-price-for-pneumococcal-vaccine/) (accessed March 24, 2017).
- 402 25 Gavi. Vaccine co-financing. 2015; : 1–4.
- 403 26 Auto-Disable (AD) and Re-Use Prevention (RUP) Syringes and Safety Boxes - current  
404 price data. Supplies Logist. UNICEF. 2016.  
405 [https://www.unicef.org/supply/index\\_62309.html](https://www.unicef.org/supply/index_62309.html) (accessed July 28, 2017).
- 406 27 Mvundura M, Lorensen K, Chweya A, *et al.* Estimating the costs of the vaccine  
407 supply chain and service delivery for selected districts in Kenya and Tanzania.  
408 *Vaccine* 2015; **33**: 2697–703.
- 409 28 Parmar D, Baruwa EM, Zuber P, Kone S. Impact of wastage on single and multi-dose  
410 vaccine vials: Implications for introducing pneumococcal vaccines in developing  
411 countries. *Hum Vaccin* 2010; **6**: 270–8.
- 412 29 Ayieko P, Akumu AO, Griffiths UK, English M. The economic burden of inpatient



413           paediatric care in Kenya: household and provider costs for treatment of pneumonia,  
414           malaria and meningitis. *Cost Eff Resour Alloc* 2009; **7**: 3.  
415    30    Larson BA, Amin AA, Noor AM, Zurovac D, Snow RW. The cost of uncomplicated  
416           childhood fevers to Kenyan households: implications for reaching international access  
417           targets. *BMC Public Health* 2006; **6**: 314.  
418  
419

420

421 Table 1: Economic and health parameters varied as part of the probabilistic sensitivity

422 analysis

| Parameter                                                            | Point estimate           | Statistical distribution | Source             |
|----------------------------------------------------------------------|--------------------------|--------------------------|--------------------|
| <b>Access to care proportions for pneumococcal diseases</b>          |                          |                          |                    |
| Hospitalised sepsis, bacteraemic and non-bacteraemic cases           | 55%                      | Beta (55,45)             | <sup>7</sup>       |
| Hospitalized meningitis cases                                        | 70%                      | Beta (70,30)             | <sup>7</sup>       |
| Non-hospitalised IPD and non-bacteraemic cases treated as outpatient | 63%                      | Beta (63,37)             | <sup>20</sup>      |
| <b>Health outcomes</b>                                               |                          |                          |                    |
| Proportion of meningitis cases developing sequelae                   | 25%                      | Beta (25,75)             | <sup>21</sup>      |
| CFR with hospital care                                               |                          |                          |                    |
| Sepsis, bacteraemic and meningitis: Children (<15 years)             | 19%                      | Beta (19,81)             | KCH                |
| Sepsis, bacteraemic and meningitis: Adults (>=15 years)              | 46%                      | Beta (46,54)             | KCH                |
| Non-bacteraemic pneumonia                                            | 5.7%                     | Beta (6,94)              | <sup>22</sup>      |
| CFR without hospital care                                            |                          |                          |                    |
| Meningitis                                                           | 97%                      | Beta (97,3)              | <sup>23</sup>      |
| Sepsis and bacteraemic pneumonia                                     | 50%                      | Beta (4,4)               | <sup>23</sup>      |
| Non-bacteraemic pneumonia                                            | 12%                      | Beta (12,88)             | <sup>23</sup>      |
| <b>Vaccination costs (US\$)</b>                                      |                          |                          |                    |
| Vaccine price per dose                                               | \$0.21-\$3.05 (Table S2) | Fixed                    | <sup>4,24,25</sup> |
| Safety boxes                                                         | \$0.46                   | Fixed                    | <sup>26</sup>      |
| AD syringes                                                          | \$0.045                  | Fixed                    | <sup>26</sup>      |
| Vaccine delivery cost per dose                                       | \$1.42                   | Gamma (4,0.4)            | <sup>27</sup>      |
| Syringe wastage                                                      | 5%                       | Fixed                    | <sup>23</sup>      |
| Vaccine wastage                                                      | 15%                      | Fixed                    | <sup>8,23,28</sup> |
| <b>Treatment costs (US\$)</b>                                        |                          |                          |                    |
| With hospital care                                                   |                          |                          |                    |
| Meningitis                                                           | \$357.74                 | Gamma (4,97)             | <sup>29</sup>      |
| Sepsis, bacteraemic and non-bacteraemic pneumonia                    | \$74.64                  | Gamma (4,19)             | <sup>29</sup>      |
| With outpatient care (All four syndomes)                             | \$2.74                   | Gamma(4,0.75)            | <sup>30</sup>      |
| Without hospital care (All four syndomes)                            | \$1.15                   | Gamma (4,0.3)            | <sup>30</sup>      |

423

424

425 Table 2: Estimated costs and cost-effectiveness ratios for different scenarios

| <b>Scenario</b>                                 | <b>Average annual cost<br/>Over 2022-2032, millions of US\$<br/>(95% PI)</b> | <b>Cost per case<br/>averted in 2032, US\$<br/>(95% PI)</b> | <b>Cost per death<br/>averted in 2032, US\$<br/>(95% PI)</b> | <b>Cost per DALY<br/>Averted in 2032, US\$<br/>(95% PI)</b> |
|-------------------------------------------------|------------------------------------------------------------------------------|-------------------------------------------------------------|--------------------------------------------------------------|-------------------------------------------------------------|
| Stopping vaccination in year 2022               | 3.3 (1.3 – 7.1)                                                              | Ref.                                                        | Ref.                                                         | Ref.                                                        |
| Continuing vaccination                          | 18.9 (13.2 – 29.3)                                                           | 876 (564- 1443)                                             | 6366 (3802 – 11226)                                          | 142 (85 – 252)                                              |
| Continuing vaccination (discounting costs only) | 18.9 (13.2 – 29.3)                                                           | 529 (341 – 873)                                             | 3852 (2300 – 6792)                                           | 67 (40 – 120)                                               |

426

**Supplementary table S1: Invasive Pneumococcal disease (IPD) separation into meningitis, pneumococcal bacteraemic pneumonia and sepsis.** IPD cases are obtained from hospitalized cases at the Kilifi County hospital among residents of the Kilifi Health and Demographic Surveillance System for the period 1999-2016 (<15) for children and 2007-2016 for adults (≥15).

| Age category | Pneumococcal Meningitis <sup>a</sup> |      | Pneumococcal Bacteraemic Pneumonia <sup>b</sup> |      | Pneumococcal Sepsis <sup>c</sup> |      |
|--------------|--------------------------------------|------|-------------------------------------------------|------|----------------------------------|------|
|              | n                                    | %    | n                                               | %    | n                                | %    |
| <1           | 52                                   | 28.0 | 85                                              | 45.7 | 49                               | 26.3 |
| 1-5          | 32                                   | 11.3 | 126                                             | 44.4 | 126                              | 44.4 |
| 6-14         | 39                                   | 29.8 | 47                                              | 35.9 | 45                               | 34.4 |
| 15-20        | 1                                    | 33.3 | 0                                               | 0.0  | 2                                | 66.7 |
| 21-49        | 11                                   | 29.7 | 3                                               | 8.1  | 23                               | 62.2 |
| 50+          | 3                                    | 11.5 | 2                                               | 7.7  | 21                               | 80.8 |

<sup>a</sup> Isolation of *S. pneumoniae* from cerebrospinal fluid (CSF) or isolation of *S. pneumoniae* from blood, accompanied by a CSF white blood cell count of  $50 \times 10^6$  cells/L or greater or a ratio of CSF glucose to plasma glucose less than 0.1

<sup>b</sup> IPD with no pneumococcal meningitis but with WHO severe or very severe pneumonia.

<sup>c</sup> IPD not meeting any of the above definitions of pneumococcal meningitis and bacteraemic pneumococcal pneumonia.

**Supplementary table S2: Vaccine price per dose paid by Kenya in each year**

| <b>Gavi transition phase</b>                                                                                                                                                                                                                                                                                                                | <b>Year</b> | <b>Vaccine price<br/>per dose<br/>(US\$)</b> |
|---------------------------------------------------------------------------------------------------------------------------------------------------------------------------------------------------------------------------------------------------------------------------------------------------------------------------------------------|-------------|----------------------------------------------|
| <b>Preparatory transition phase:</b><br>Contribution to price per dose increases by 15% annually                                                                                                                                                                                                                                            | 2017        | 0.21                                         |
|                                                                                                                                                                                                                                                                                                                                             | 2018        | 0.24                                         |
|                                                                                                                                                                                                                                                                                                                                             | 2019        | 0.28                                         |
|                                                                                                                                                                                                                                                                                                                                             | 2020        | 0.31                                         |
|                                                                                                                                                                                                                                                                                                                                             | 2021        | 0.37                                         |
| <b>Accelerated transition phase:</b><br>Contribution starts at an additional 20% of the difference between the projected price of the vaccine in the year a country enters fully self-financing phase and the co-financing amount per dose paid in the preceding year, and increases linearly over four years to reach the projected price. | 2022        | 0.91                                         |
|                                                                                                                                                                                                                                                                                                                                             | 2023        | 1.34                                         |
|                                                                                                                                                                                                                                                                                                                                             | 2024        | 1.77                                         |
|                                                                                                                                                                                                                                                                                                                                             | 2025        | 2.20                                         |
|                                                                                                                                                                                                                                                                                                                                             | 2026        | 2.63                                         |
| <b>Fully self-financing:</b><br>Country pays the full vaccine price                                                                                                                                                                                                                                                                         | 2027 - 2032 | 3.05*                                        |

\*This is the price assumed when Kenya enters the fully self-financing phase. It is the current price of PCV10. The actual price then might be lower since prices are generally expected to go down, but there are currently no projections from Gavi.

## Figure captions

### Figure 1: Model fit to carriage data

Observed (circular dots with 95% credible intervals shown by spikes) and predicted (lines with 95% predictive intervals shown by shaded areas) carriage prevalence of vaccine-serotypes (VT), shown in red, strong non-vaccine serotypes (sNVT), shown in blue, and weak non-vaccine serotypes (wNVT), shown in lime green, over time. The age groups are labelled at the panel titles.

### Figure 2: Model fit to IPD incidence data

Observed (circular dots with 95% credible intervals shown by spikes) and predicted (lines with 95% predictive intervals shown by shaded areas) IPD incidence of vaccine-serotypes (VT), shown in red, strong non-vaccine serotypes (sNVT), shown in blue, and weak non-vaccine serotypes (wNVT), shown in lime green, over time. The age groups are labelled at the panel titles.

### Figure 3: Costs, DALYs, incremental cost-effectiveness ratios (ICERs) and invasive pneumococcal disease (IPD) incidence at the end of each year

The first (top-most) panel shows the predicted incidence of IPD when vaccination is continued in 2022 (cyan line), its 95% prediction interval (cyan shade), and when vaccination is stopped (red line, with 95% prediction interval shown in light-red shade) over time since vaccine introduction in Kenya at the end of 2010. The second panel shows the cost of treatment and vaccination in each year (cyan line with cyan shade for 95% PI) when vaccination is continued, and the cost of treatment in each year when vaccination (red line, with light-red shade for 95% PI) is discontinued in 2022. The third panel shows the corresponding DALYs gained in each year. The fourth (bottom-most) panel shows the ICER (y-axis), incremental (continuing vaccination over stopping vaccination) cost per DALY averted (cyan line) and its 95% prediction interval (cyan shade) in each year (x-axis). Vertical dotted lines indicate Gavi transition stages.

### **Supplementary Figure 1: IPD projection with and without hyporesponsiveness by age group**

Predicted incidence of IPD when hyporesponsiveness is ignored in the carriage model (red line with 95% prediction interval shown in light-red shade, and when hyporesponsiveness is allowed for in the model structure (blue line, with 95% prediction interval shown in light-blue shade) over time since vaccine introduction in Kenya. Age groups are labeled on the panel titles.

### **Supplementary Figure 2: Model structure flow diagram**

The epidemiological states include individuals that are susceptible (non-carrying),  $S$ ; carry a vaccine serotype,  $V$ ; carry a weak non-vaccine serotype,  $N_w$ ; carry a strong non-vaccine serotype,  $N_s$ ; carry simultaneously a weak and a strong non-vaccine serotype,  $N_{sw}$ ; carry simultaneously a vaccine serotype and a weak non-vaccine serotype,  $B_w$ ; or carry simultaneously a vaccine serotype and a strong non-vaccine serotype,  $B_s$  (see text). Once vaccinated, the individual moves to one of the corresponding states,  $(S^{(v)}, V^{(v)}, N_w^{(v)}, N_s^{(v)}, B_w^{(v)} \text{ and } B_s^{(v)})$ . The acquisition rates from the single to multiple serotype carriage states are reduced by competition parameters denoted by  $c$  with two subscripts; the first denoting the serotype group ( $v, s \text{ and } w$ , for VT, strong NVT and weak NVT respectively) of the resident serotypes and the second denoting the age-group. The competition parameters have two sets of values, one for age group  $<6$  and another for age group  $\geq 6$  years (see Appendix). The age-group specific VT, weak NVT and strong NVT clearance rates are denoted by  $r_{Vi}$ ,  $r_{Nwi}$  and  $r_{Nsi}$ , respectively. In addition to the transitions between the 14 epidemiological states as shown in the Figure, individuals die from any states at age-specific death rates and new individuals are born into the completely susceptible state.

### **Supplementary Figure 3: Model structure flow diagram including hyporesponsiveness**

The epidemiological states include individuals that are susceptible (non-carrying),  $S$ ; carry a vaccine serotype,  $V$ ; carry a weak non-vaccine serotype,  $N_w$ ; carry a strong non-vaccine serotype,  $N_s$ ; carry simultaneously a weak and a strong non-vaccine serotype,  $N_{sw}$ ; carry simultaneously a vaccine serotype and a weak non-vaccine serotype,  $B_w$ ; or carry simultaneously a vaccine serotype and a strong non-vaccine serotype,  $B_s$  (see text). Once

vaccinated, individuals not carrying vaccine serotypes move to the corresponding states  $(S^{(v)}, N_w^{(v)}, N_s^{(v)}, N_{sw}^{(v)})$  while those carrying vaccine serotypes  $(V, B_w^{(v)}, B_s^{(v)})$  move to the corresponding hyporesponse-associated states  $(hV, hB_w^{(v)}, hB_s^{(v)})$ . The acquisition rates from the single to multiple serotype carriage states are reduced by competition parameters denoted by  $c$  with two subscripts; the first denoting the serotype group ( $v, s$  and  $w$ , for VT, strong NVT and weak NVT respectively) of the resident serotypes and the second denoting the age-group. The competition parameters have two sets of values, one for age group  $<6$  and another for age group  $\geq 6$  years (see Appendix). The age-group specific VT, weak NVT and strong NVT clearance rates are denoted by  $r_{Vi}$ ,  $r_{Nwi}$  and  $r_{Nsi}$ , respectively. In addition to the transitions between the 21 epidemiological states as shown in the Figure, individuals die from any states at age-specific death rates and new individuals are born into the completely susceptible state.





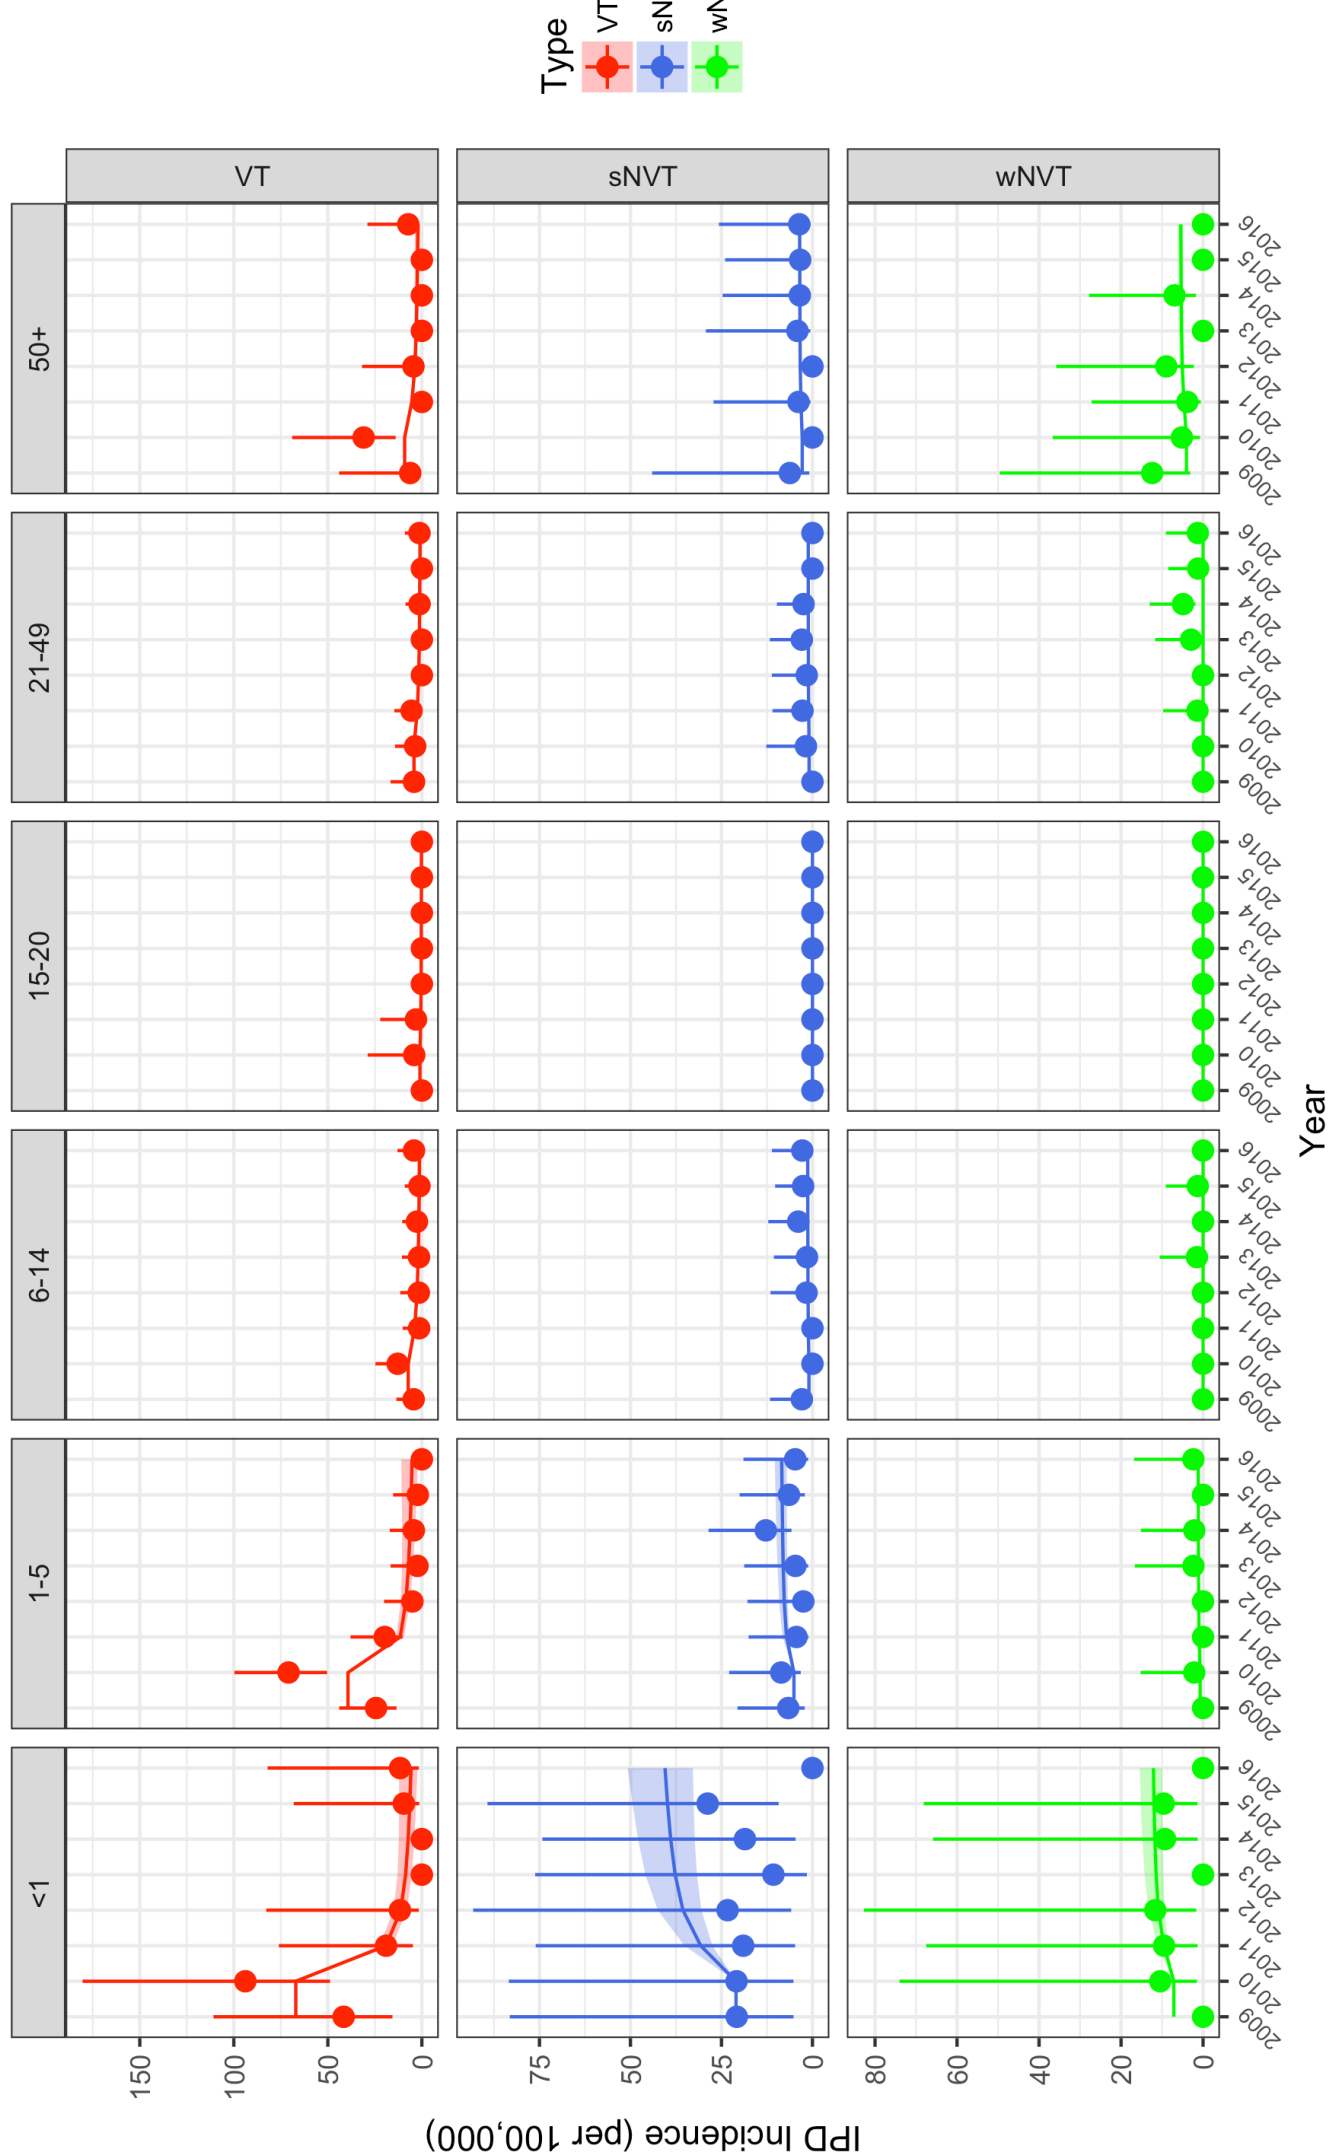

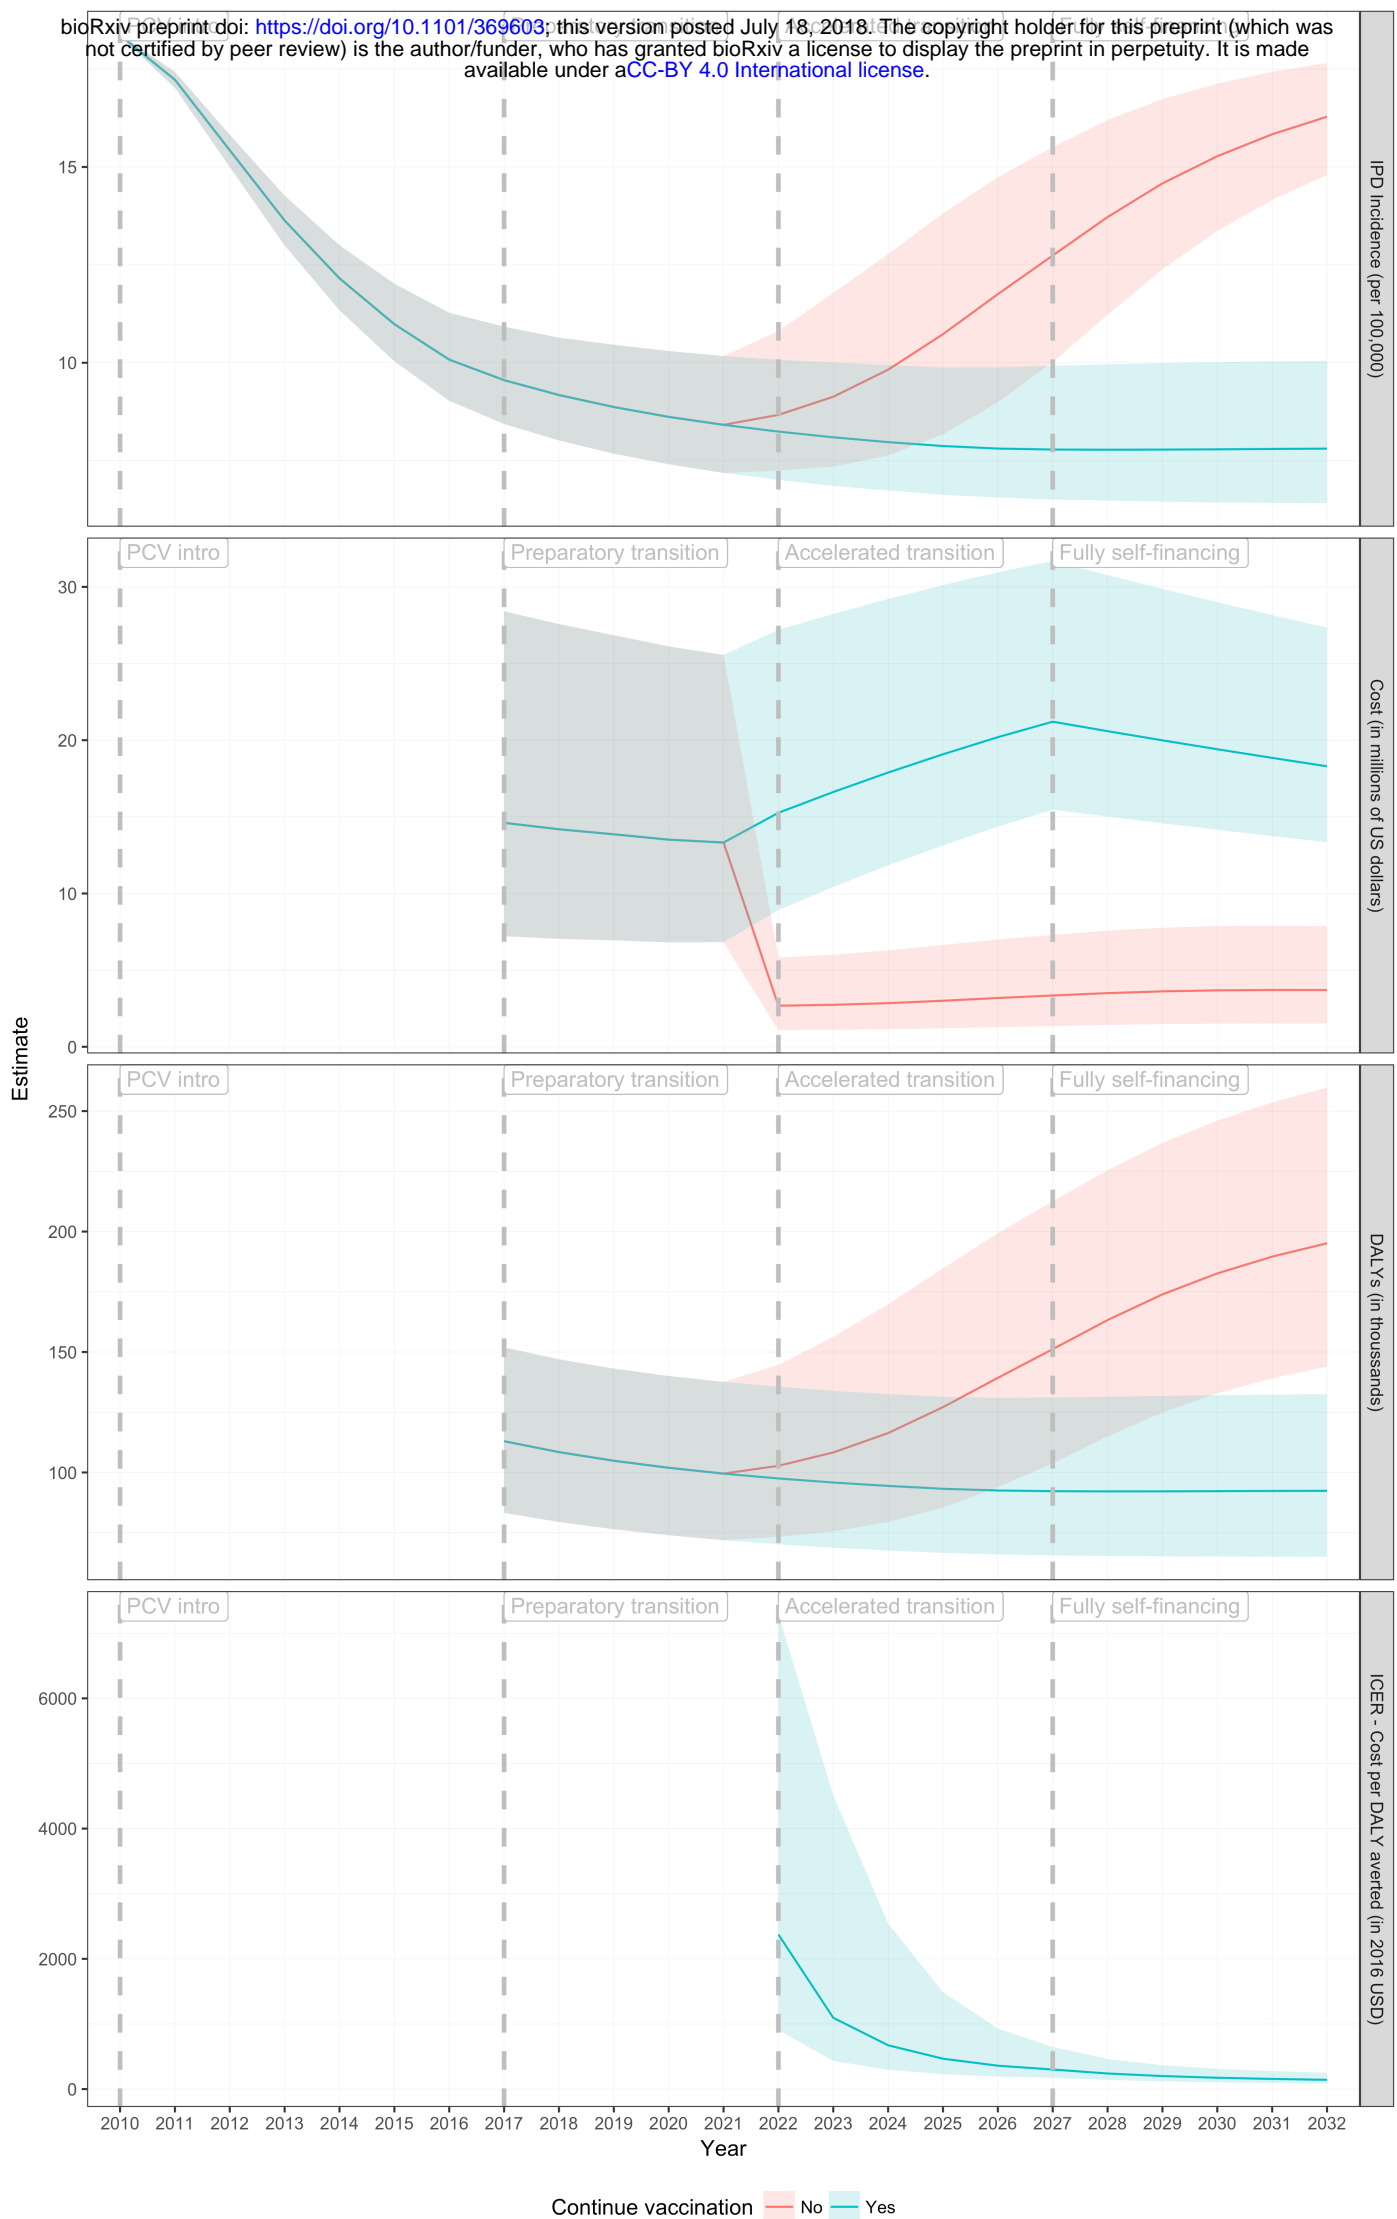

## Appendix: Model structure and parameters estimates

### *Model structure*

A more detailed description of the model and the likelihood function is presented in<sup>1</sup>. The brief description provided in this appendix is to help in the understanding of the notation used, without necessarily referring to<sup>1</sup>. The model is compartmental, age-structured and dynamic. Compartments are defined according to pneumococcal carriage states (Supplementary Figure 2). It has a Susceptible-Infected-Susceptible (SIS) structure for three serotype groups: the PCV10 serotypes, strong NVT and weak NVT.

At any point in time, an unvaccinated individual can be susceptible (non-carrying) in state  $S$ ; carry a VT,  $V$ ; carry a weak NVT,  $N_w$ ; carry a strong NVT,  $N_s$ ; carry simultaneously a weak and strong NVT,  $N_{sw}$ ; carry simultaneously a VT and weak NVT,  $B_w$ ; or carry simultaneously a VT and a strong NVT,  $B_s$ . Once vaccinated, the individual moves to one of the corresponding states ( $S^{(v)}$ ,  $V^{(v)}$ ,  $N_w^{(v)}$ ,  $N_s^{(v)}$ ,  $N_{sw}^{(v)}$ ,  $B_w^{(v)}$ ,  $B_s^{(v)}$ ). We also fitted a model in which the efficacy of the vaccine on carriage acquisition is reduced due to prevailing carriage at the point of vaccination (hyporesponsiveness) is considered. Under this model, upon vaccination, individuals not carrying vaccine serotypes move to the corresponding states ( $S^{(v)}$ ,  $N_w^{(v)}$ ,  $N_s^{(v)}$ ,  $N_{sw}^{(v)}$ ) while those carrying vaccine serotypes ( $V$ ,  $B_w^{(v)}$ ,  $B_s^{(v)}$ ) move to the corresponding hyporesponse-related states ( $hV$ ,  $hB_w^{(v)}$ ,  $hB_s^{(v)}$ ) (Supplementary Figure 3).

### *Parameterisation*

A susceptible unvaccinated individual in age group  $i$  becomes colonised with VTs, strong NVTs or weak NVTs at age-group-specific time-dependent rates (forces of infection) denoted by  $\lambda_{Vi}(t)$ ,  $\lambda_{Nsi}(t)$  and  $\lambda_{Nwi}(t)$ , respectively. The forces of infection were expressed as functions of the social mixing matrix and age-group specific factors ( $q_i$ ) that scale the rate of social contacts into infectious contacts. Due to competition between serotypes in colonising the nasopharynx, the acquisition rate of a secondary serotype is lower than the acquisition rate

**Table A1.** Estimated parameters of the dynamic transmission models

| Parameter                                                              | Estimate (95% Credible Interval)                                                                                                                                           | Estimate accounting for hyporesponsiveness (95% Credible Interval)                                                                                                         |
|------------------------------------------------------------------------|----------------------------------------------------------------------------------------------------------------------------------------------------------------------------|----------------------------------------------------------------------------------------------------------------------------------------------------------------------------|
| Competition parameters                                                 | $c_{s0} = 0.42$ (0.24, 0.62)<br>$c_{w0} = 0.73$ (0.44, 0.97)<br>$c_{v0} = 0.44$ (0.25, 0.70)<br>$c_s = 0.11$ (0.01, 0.40)<br>$c_{vw} = c_v = c_w = 0.70$ (0.30, 0.98)      | $c_{s0} = 0.41$ (0.25, 0.59)<br>$c_{w0} = 0.70$ (0.43, 0.97)<br>$c_{v0} = 0.46$ (0.27, 0.70)<br>$c_s = 0.10$ (0.01, 0.30)<br>$c_{vw} = c_v = c_w = 0.66$ (0.24, 0.98)      |
| Probability of infection per 100 contacts                              | $q_1 = 0.14$ (0.11, 0.19)<br>$q_2 = 0.45$ (0.38, 0.55)<br>$q_3 = 0.30$ (0.26, 0.35)<br>$q_4 = 0.08$ (0.06, 0.11)<br>$q_5 = 0.16$ (0.13, 0.19)<br>$q_6 = 0.06$ (0.05, 0.07) | $q_1 = 0.14$ (0.11, 0.19)<br>$q_2 = 0.45$ (0.39, 0.54)<br>$q_3 = 0.30$ (0.26, 0.35)<br>$q_4 = 0.08$ (0.06, 0.10)<br>$q_5 = 0.16$ (0.13, 0.19)<br>$q_6 = 0.06$ (0.05, 0.07) |
| Vaccine efficacy again carriage                                        | $\varepsilon = 0.59$ (0.49, 0.68)                                                                                                                                          | $\varepsilon = 0.58$ (0.47, 0.68)                                                                                                                                          |
| Vaccine efficacy against carriage for VT carriers (hyporesponsiveness) | N/A                                                                                                                                                                        | $\varepsilon_h = 0.54$ (0.40, 0.68)                                                                                                                                        |

of that serotype in a completely susceptible individual. Three competition parameters,  $c_{v0}$ ,  $c_{w0}$  and  $c_{s0}$ , represent the fraction by which acquisition rates of secondary serotypes are reduced in <6 year olds infected with VTs, weak NVTs and strong NVTs, respectively. Two competition parameters,  $c_{vw} = c_v = c_w$  and  $c_s$ , were used for individuals aged  $\geq 6$  years infected with VTs/weak NVTs and strong NVTs, respectively. In the vaccinated compartments the rate of acquisition of VTs are reduced by the vaccine efficacy against carriage acquisition denoted  $\varepsilon$ , or  $\varepsilon_h$  according to whether the compartment is associated with hyporesponsiveness.

The Metropolis-Hastings algorithm was used to draw samples from the posterior distributions of the parameters. Uniform priors in the range 0-1 were used for competition parameters and the social contact scaling parameters ( $q_i$ ). For the vaccine efficacy parameters we used a normal prior centered around 50% with 95% uncertainty interval of 40-60%. 50,000 adaptive MCMC iterations were used. After a burn-in of 25,000 was discarded the remaining stationary samples were thinned to 5000 to estimate the posterior distribution. Convergence was assessed graphically, by observing was no negative or positive trend (zero gradient) in the chain, and by using Geweke diagnostic to check if a chain was stationary. The thinned posterior samples of the parameters were summarised to obtain point estimates (posterior mean) and probability (credibility) intervals. The parameter estimates are shown in Table A1.

<sup>1</sup> Ojal J, Flasche S, Hammitt LL, Akech D, Kiti MC, Kamau T, et al. *Sustained reduction in vaccine-type invasive pneumococcal disease despite waning effects of a catch-up campaign in Kilifi, Kenya: a mathematical model based on pre-vaccination data*. *Vaccine*. 2017;35:4561–8.

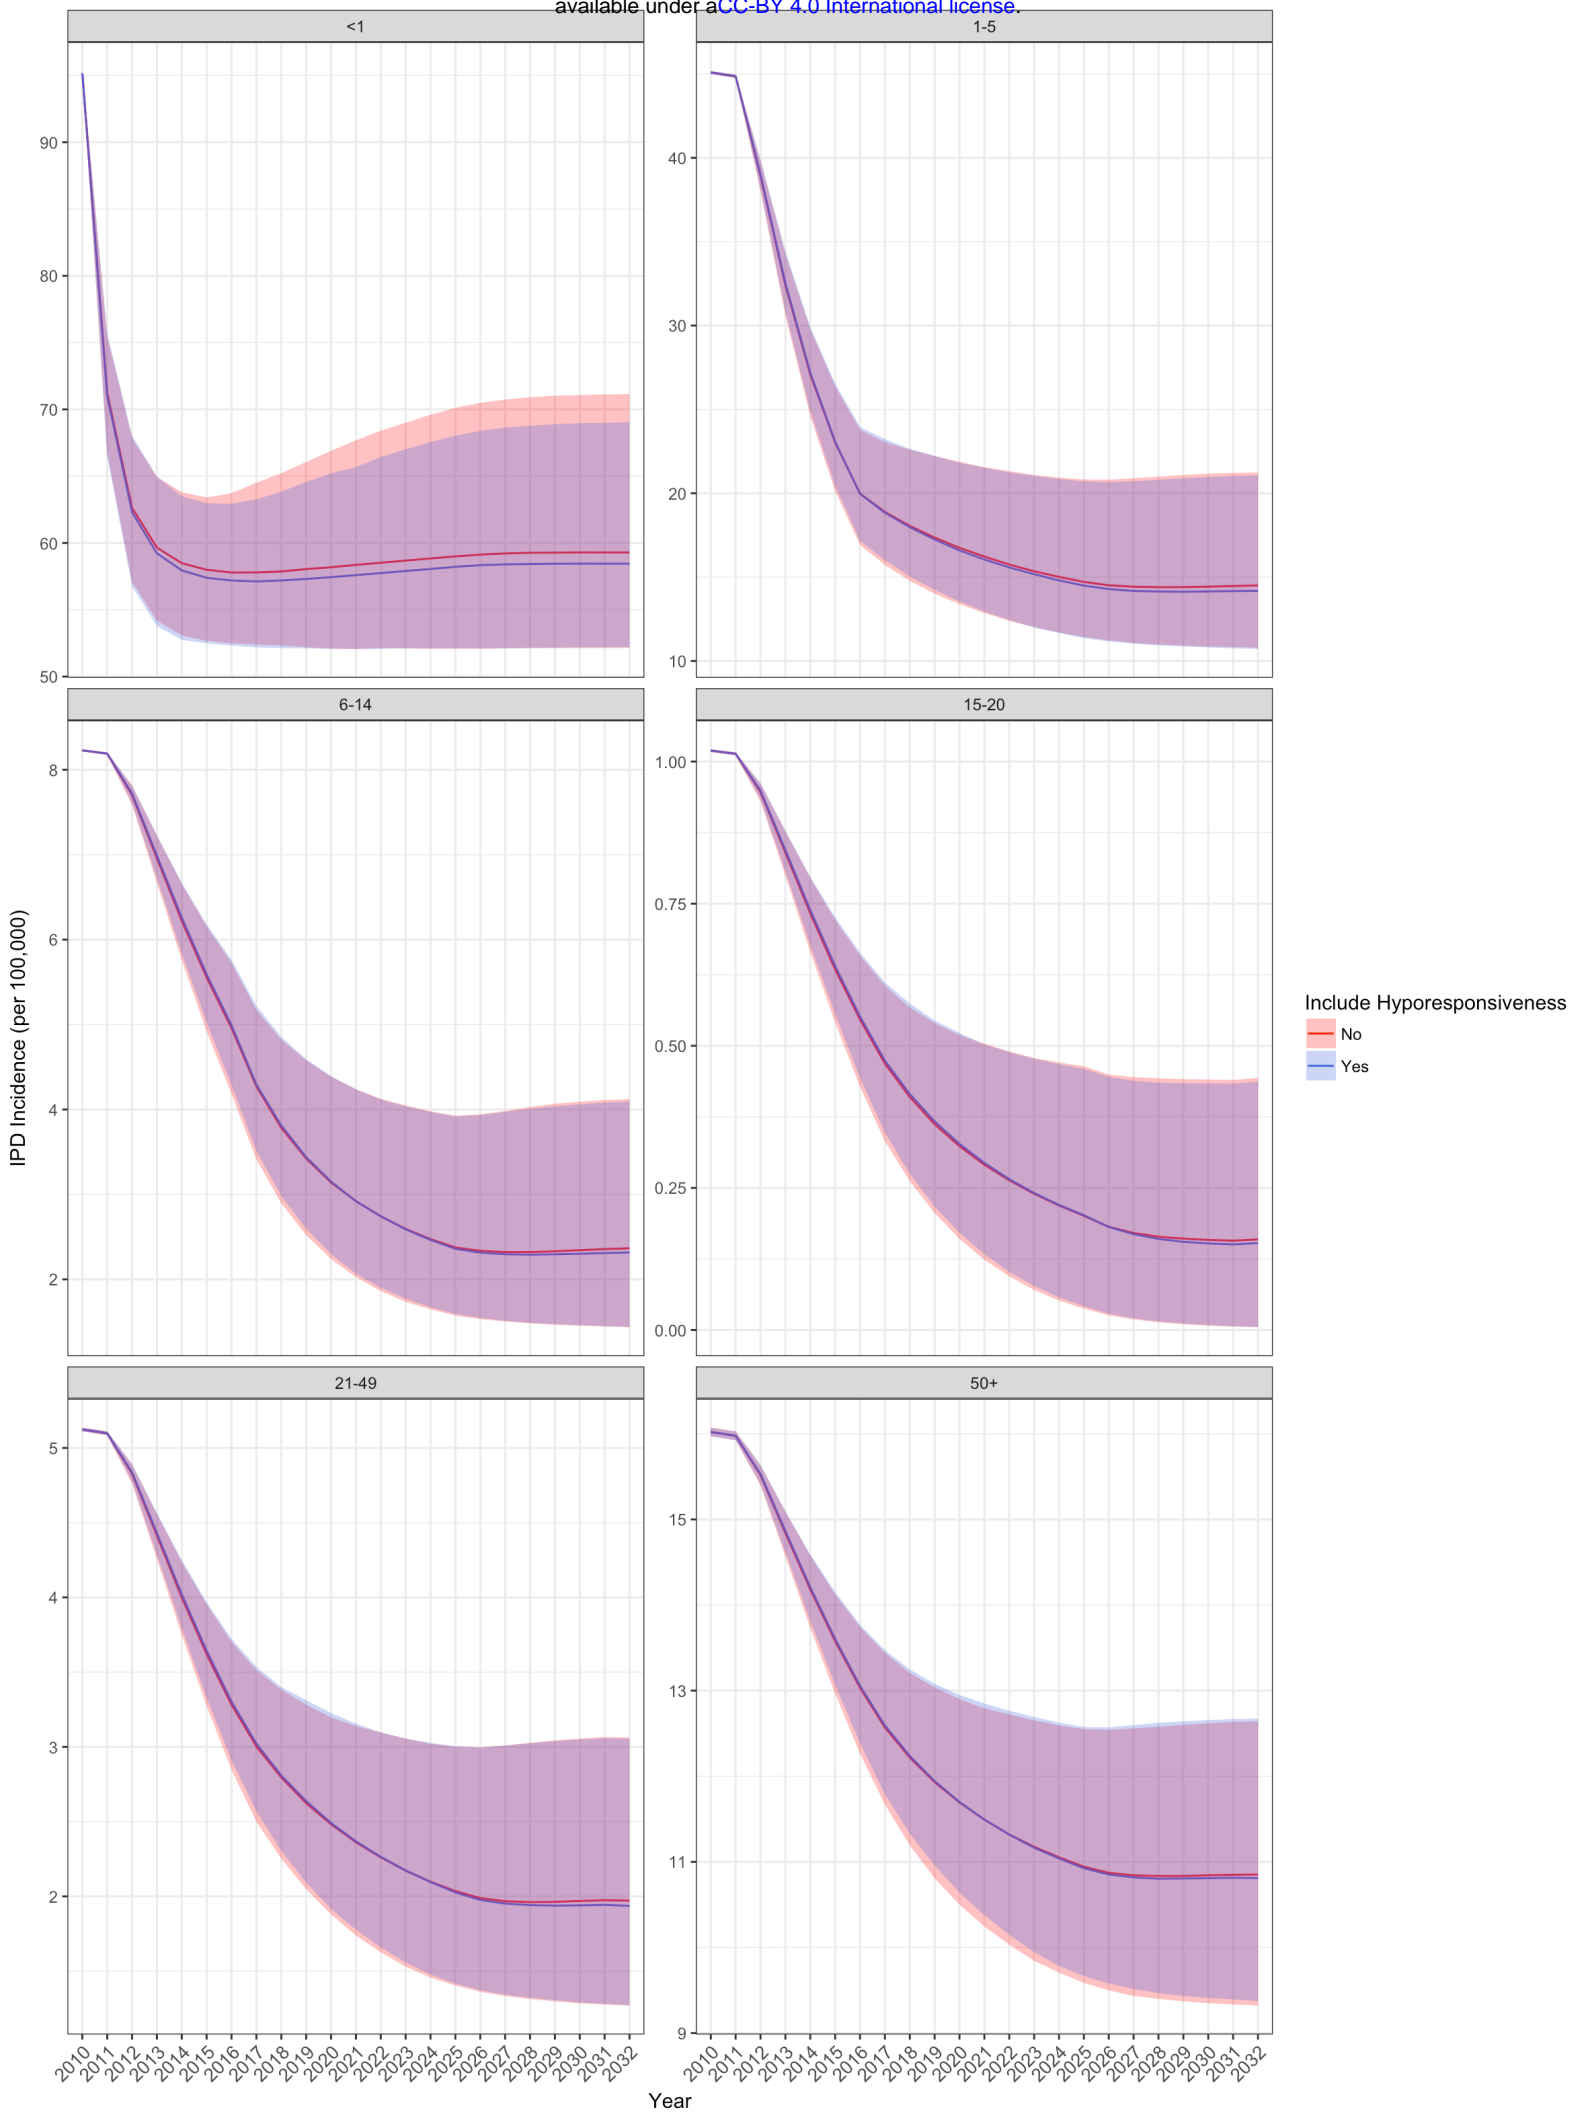

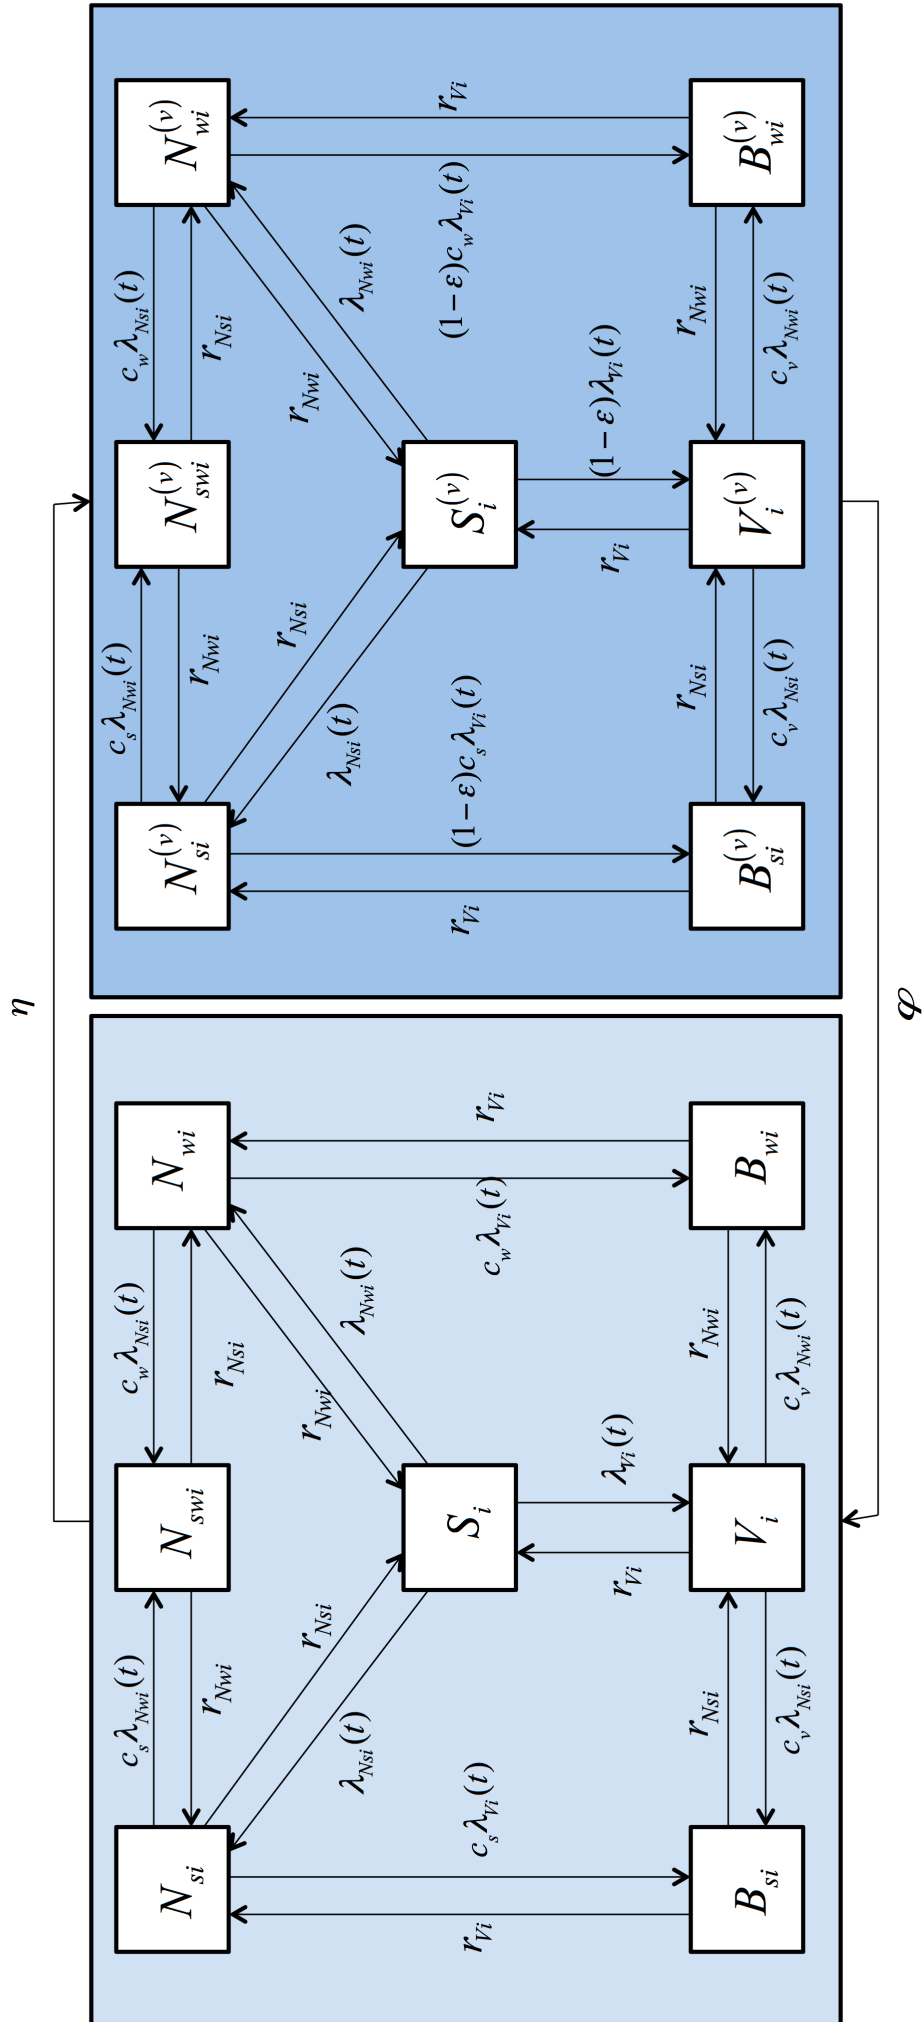



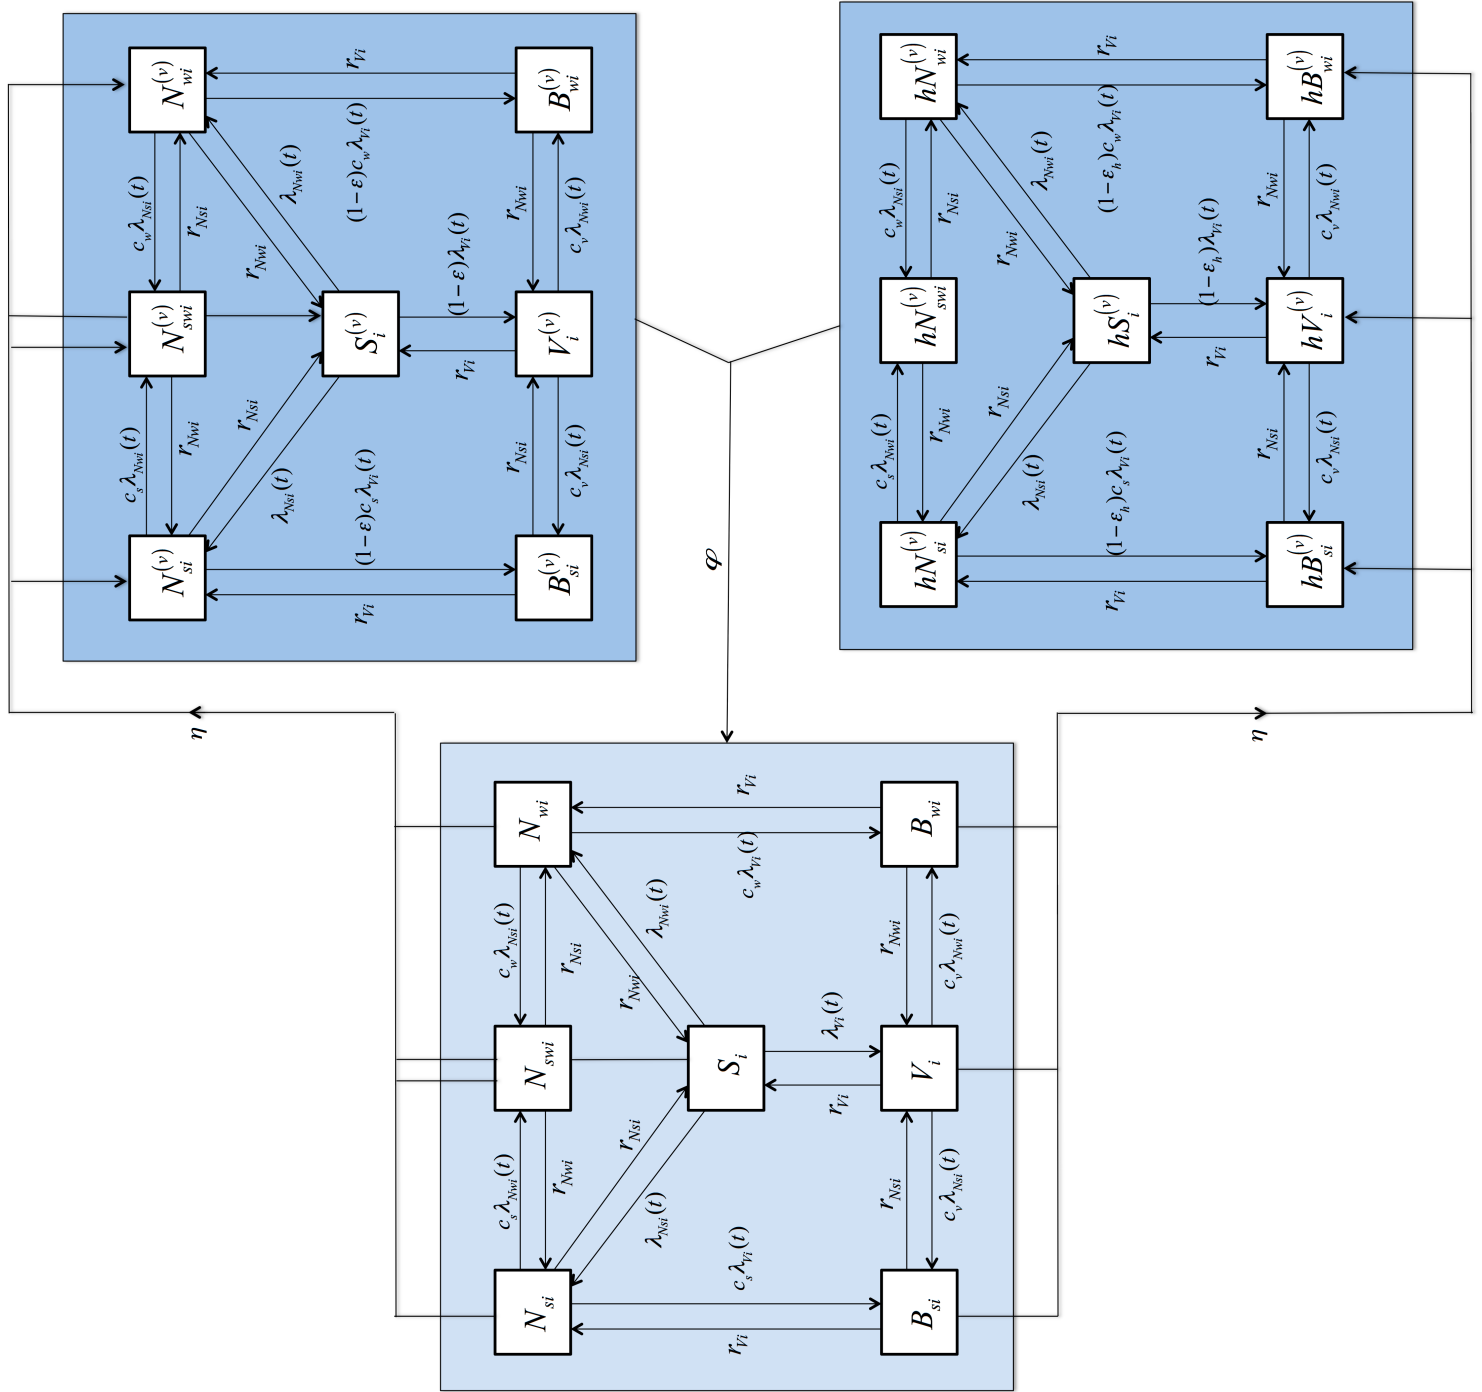

Source: http://biorxiv.org/content/10.1101/369603v1.full.pdf
